# Supplementary material
Source: PubMed Central journal article supplement (PMC2569169)
Supplement: blood-2008-03-142661_1.pdf [file blood-2008-03-142661_1.pdf]

| Months after<br>Transplantation | Primary (1) |      |      |      | Secondary (2) |      |      | Tertiary (3) |      |     | Quaternary (4) |     |     |     |      |
|---------------------------------|-------------|------|------|------|---------------|------|------|--------------|------|-----|----------------|-----|-----|-----|------|
|                                 | 1           | 2    | 4    | 6    | 1             | 2    | 4    | 2            | 3    | 5   | 1              | 3   | 5   | 7   | 8    |
| Recipient<br>Group: <b>B</b>    | 99%         | 100% | 100% | 100% | 96%           | 100% | 100% | 100%         | 100% | 97% | 87%            | 43% | 17% | 6%  | 20%  |
| Recipient<br>Group: <b>F</b>    | 97%         | 100% | 97%  | 100% | 90%           | 99%  | 100% | 100%         | 100% | 79% | 95%            | 73% | 47% | 66% | 100% |
